# Supplementary material for: Unraveling the dynamic behaviors of BF4-based ionic liquids at the SnO2/FAPbI3 interface using ab initio molecular dynamics simulations
Source: Royal Society of Chemistry journal article supplement (doi:10.1039/d3cp02148c), 2023-01-01
Supplement: d3cp02148c6.pdf [file d3cp02148c6.pdf]

Supporting information for

## Unraveling the dynamic behaviors of $\text{BF}_4^-$ -based ionic liquids at $\text{SnO}_2/\text{FAPbI}_3$ interface by *Ab initio* molecule dynamic simulations

Jinge Han,<sup>a</sup> Hongbin Xiao,<sup>\*a,b</sup> Yanru Guo,<sup>a</sup> Xue Liu,<sup>a</sup> Zhigang Zang,<sup>a</sup> and Ru Li<sup>\*a</sup>

<sup>a</sup>Key Laboratory of Optoelectronic Technology & Systems (Ministry of Education), College of Optoelectronic Engineering, Chongqing University, Chongqing 400044, China.

<sup>b</sup>School of Chemistry and Chemical Engineering, Chongqing University, Chongqing 401331, China.

\*Corresponding author: xiaohongbin@cqu.edu.cn; ru.li@cqu.edu.cn

### Simulation methods:

*Ab initio molecular dynamic simulations:* the AIMD simulations are performed by the open source code CP2K<sup>1</sup> in the constant-volume and constant-temperature (NVT) ensemble. The temperature was controlled with a conical sampling through velocity rescaling (CSVR) thermostat at room temperature (300 K). The time step was set to 1.0 fs. A PBE-D3 functional was used with double-zeta basis sets (DZVP-MOLOPT) and Goedecker–Teter–Hutter pseudopotentials.<sup>2</sup> The cut-off and real-cutoff were set to 500 Ry and 55 Ry, respectively. The AIMD simulations were run for approximately 10 ps to ensure equilibrium. For the  $\text{SnO}_2$  (110) surface, a 25 Å vacuum in the  $z$  direction was used. A  $3\times 3\times 3$  supercell with one oxygen vacancy defect is constructed. The sizes of the simulation box are  $20.5019 \text{ \AA}\times 12.9729 \text{ \AA}\times 37.895 \text{ \AA}$ . The initial geometry is to place one  $\text{BF}_4^-$  anion above the oxygen vacancy of  $\text{SnO}_2$  with a distance of 3 Å. The  $\text{BF}_4^-$  anion is placed under the cation of the ionic liquid (IL), facing the  $\text{SnO}_2$  surface. For the  $\text{FAPbI}_3$  side, a  $3\times 3\times 3$  supercell (001) surface with the FA terminated morphology is used. The sizes of the simulation box are  $19.0839 \text{ \AA}\times 19.0839 \text{ \AA}\times 38.6259 \text{ \AA}$  and the vacuum thickness in the  $z$  direction is 25 Å. One FA vacancy is created for the AIMD simulation and the IL molecule is placed above the  $\text{FAPbI}_3$  surface with a distance of 3 Å. To model the iodine migration energy barrier, we created the iodine vacancy close to the FA vacancy, where it was occupied by the IL residues. To explore the influence of the initial configuration of IL on the dynamic behaviors of the  $\text{BF}_4^-$  anion, we rotate the  $\text{BMIMBF}_4$  by 180°. VMD package is used to visualize the trajectory produced by AIMD simulations.<sup>3</sup>

*Density of state (DOS) calculations:* the DOS calculations are carried out by the open source code Quantum Espresso v7.2,<sup>4</sup> the SSSP Efficiency (v 1.2.1) pseudopotentials<sup>5</sup> are used to optimize the structure produced by CP2K AIMD simulations until the force is less than  $10^{-4}$  Ry. During the SCF calculation, the ecutwfc cutoff of 80 Ry and energy convergence of  $10^{-8}$  Ry are set. The automatic K points  $1\times 2\times 1$  is used to sample the Brillouin zone.

*Electronic static potential:* the structure of the ILs are optimized by Gaussian 09 at the b3lyp/6-311+g(d,p) level with DFT-D3, and the minimum of the  $\text{BF}_4^-$  terminal group in these ILs is obtained with the help of Multiwfn code.<sup>6</sup>

*Iodine ion migration*: the ion migration energy barrier is calculated by the CI-NEB method that is implemented in the CP2K code. The structure before and after the ion migration is first optimized, and the number of replica is set to 5 and the k-spring is set to 0.05. The convergence criteria are MAX\_FORCE less than 0.003, RMS\_FORCE less than 0.005, MAX\_DR less than 0.002 and RMS\_DR less than 0.005.

Table S1. The cation-anion distance of BMIM<sup>+</sup>BF<sub>4</sub><sup>-</sup>, ICy<sup>+</sup>BF<sub>4</sub><sup>-</sup> and DHIM<sup>+</sup>BF<sub>4</sub><sup>-</sup>.

| Molecule                  | BMIM <sup>+</sup> BF <sub>4</sub> <sup>-</sup> | ICy <sup>+</sup> BF <sub>4</sub> <sup>-</sup> | DHIM <sup>+</sup> BF <sub>4</sub> <sup>-</sup> |
|---------------------------|------------------------------------------------|-----------------------------------------------|------------------------------------------------|
| Cation-anion distance (Å) | 3.12090                                        | 3.28038                                       | 3.70598                                        |

Table S2. Formation energy of different SnO<sub>2</sub> surfaces.

| Surface          | (100)  | (110)  | (111)  |
|------------------|--------|--------|--------|
| Energy (eV/atom) | -5.833 | -5.935 | -5.861 |

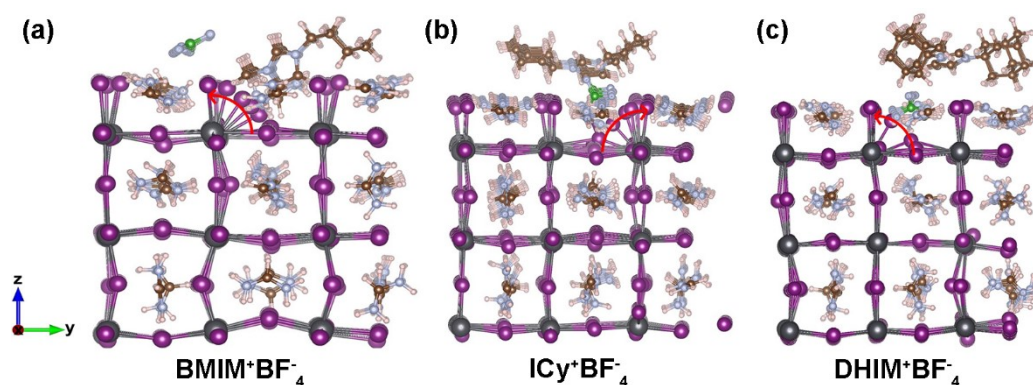

Figure S1. Iodine ion migration path when BMIM<sup>+</sup>BF<sub>2</sub> (a), ICy<sup>+</sup>BF<sub>3</sub> (b) and DHIM<sup>+</sup>BF<sub>3</sub> (c) residues get absorbed on the FA vacancy of the FAPbI<sub>3</sub> (001) surface. The red arrow shows the trajectory of the iodine ion migration path.

#### Reference:

1. T. D. Kuhne, M. Iannuzzi, M. Del Ben, V. V. Rybkin, P. Seewald, F. Stein, T. Laino, R. Z. Khaliullin, O. Schutt, F. Schiffmann, D. Golze, J. Wilhelm, S. Chulkov, M. H. Bani-Hashemian, V. Weber, U. Borstnik, M. TAILLEFUMIER, A. S. Jakobovits, A. Lazzaro, H. Pabst, T. Muller, R. Schade, M. Guidon, S. Andermatt, N. Holmberg, G. K. Schenter, A. Hehn, A. Bussy, F. Belleflamme, G. Tabacchi, A. Gloss, M. Lass, I. Bethune, C. J. Mundy, C. Plessl, M. Watkins, J. VandeVondele, M. Krack, and J. Hutter, *J Chem Phys* 152 (19), 194103 (2020).
2. Joost VandeVondele and Jürg Hutter, *The Journal of Chemical Physics* 127 (11), 114105 (2007).
3. William Humphrey, Andrew Dalke, and Klaus Schulten, *Journal of molecular graphics* 14 (1), 33 (1996).
4. P. Giannozzi, O. Andreussi, T. Brumme, O. Bunau, M. Buongiorno Nardelli, M. Calandra, R. Car, C. Cavazzoni, D. Ceresoli, M. Cococcioni, N. Colonna, I. Carnimeo, A. Dal Corso, S. de Gironcoli, P. Delugas, R. A. DiStasio, A. Ferretti, A. Floris, G. Fratesi, G. Fugallo, R. Gebauer, U. Gerstmann, F. Giustino, T. Gorni, J. Jia, M. Kawamura, H. Y. Ko, A. Kokalj, E. Küçükbenli, M. Lazzeri, M. Marsili, N. Marzari, F. Mauri, N. L. Nguyen, H. V. Nguyen, A. Otero-de-la-Roza,

- L. Paulatto, S. Poncé, D. Rocca, R. Sabatini, B. Santra, M. Schlipf, A. P. Seitsonen, A. Smogunov, I. Timrov, T. Thonhauser, P. Umari, N. Vast, X. Wu, and S. Baroni, *Journal of Physics: Condensed Matter* 29 (46), 465901 (2017).
5. Gianluca Prandini, Antimo Marrazzo, Ivano E. Castelli, Nicolas Mounet, and Nicola Marzari, *npj Computational Materials* 4 (1), 72 (2018).
6. Tian Lu and Feiwu Chen, *Journal of Computational Chemistry* 33 (5), 580 (2012).
